# Supplementary material for: MicroRNA Expression Signatures of Bladder Cancer Revealed by Deep Sequencing
Source: PLoS One. 2011 Mar 28;6(3):e18286. doi: 10.1371/journal.pone.0018286 (PMC3065473; doi:10.1371/journal.pone.0018286)
Supplement: Table S2 — The sequences of novel miRNA candidates were detected in bladder urothelial carcinoma and matched histologically normal urothelium. (XLS) [file pone.0018286.s002.xls]

## Sheet: novel miRNA sequence candidates
Sequence of Novel miRNA Candidates	B12-NmiRNA	B12-TmiRNA	B13-NmiRNA	B13-TmiRNA	B15-NmiRNA	B15-TmiRNA	B16-NmiRNA	B16-TmiRNA	B20-NmiRNA	B20-TmiRNA	B2-NmiRNA	B2-TmiRNA	B30-NmiRNA	B30-TmiRNA	B4-NmiRNA	B4-TmiRNA	B5-NmiRNA	B5-TmiRNA
GAGAGGAACATGGGCTCAGGACA	0	0	14	0	0	0	0	0	0	0	0	0	0	0	9	9	0	0
GGAGGAACCTTGGAGCTTCG	0	0	0	0	0	0	0	0	0	0	290	528	0	0	0	0	0	0
TTTTTTGCTGGAACATTTCTGG	0	478	0	0	0	0	0	20	0	0	0	0	0	0	0	11	0	0
TGAGTGTTGTCTACGAGGGCAT	0	5	0	0	0	23	0	0	0	0	0	0	0	0	0	5	0	0
TCAGGATCAGGATCTGCAGAGT	0	0	0	0	0	0	0	5	0	0	0	0	0	0	0	8	0	0
AGTGATGATGAGAGAGGCTGAAC	0	0	0	0	0	11	0	0	0	0	0	0	0	13	0	0	0	0
CACAGGCAGGAGACCCCACAG	0	0	0	5	0	0	0	0	0	0	0	0	0	0	0	8	0	0
GCAGGAAGAGACGCAGCAGC	0	0	0	0	0	0	0	0	0	0	10	27	0	0	0	0	0	0
TCTGCCACAAGAATATAGAGC	0	0	0	0	0	0	11	0	24	5	0	0	0	0	5	0	0	0
GAGAAATGCTGGACTAATCTGC	0	0	0	0	11	0	18	0	30	11	0	0	0	0	0	0	0	0
TGGGCAGGGGCTTATTGTAGGAG	0	0	0	6	5	0	0	10	0	0	0	0	0	24	0	7	0	11
AAAGACATAGTTGCAAGATGGG	35	0	0	0	31	0	7	0	11	6	0	0	7	21	0	0	0	0
TCTGTGAGACCAAAGAACTACT	0	11	13	8	9	7	0	10	5	7	0	0	0	36	0	9	8	8
TTTGTATGGATATGTGTGTGTAT	0	0	0	0	0	0	0	0	0	0	0	0	0	0	9	8	0	0
AGTAGTGTAGAGATTGGTTTG	0	0	15	0	8	26	15	0	0	0	0	0	0	0	0	0	0	0
AGGACTGCTGGAGGACCACAAAGA	0	0	0	0	0	5	0	0	0	0	0	0	0	6	0	0	0	0
TCAGGTGTGGAAACTGAGGCAG	5	143	50	85	26	100	22	47	14	71	0	0	7	406	54	55	57	55
ACCTGGACCCAGCGTAGACAAAG	0	0	0	12	8	0	0	12	0	10	0	0	0	0	0	0	38	26
ATTGTCCTTGCTGTTTGGAGA	13	0	0	0	0	0	0	0	28	0	0	0	0	0	31	0	0	81
ACTGGACTTGGAGTCAGAAGA	379	250	415	492	356	61	339	141	674	236	0	0	0	0	317	343	341	323
ACTTGTAATGGAGAACACTAAGC	0	6	0	9	0	0	0	0	0	0	0	0	0	0	0	0	0	0
CAGTAGTGTAGAGATTGGTTTG	0	0	0	0	0	0	0	18	0	19	0	0	0	0	0	0	0	0
CCTCACCATCCCTTCTGCCTGC	0	0	11	0	7	0	6	7	12	0	0	0	0	0	0	0	0	0
CATGCTAGGATAGAAAGAATGGG	0	7	0	0	0	0	0	0	0	0	0	0	0	0	0	0	0	5
GGAGCGTTTTGTGGATTTGTTTT	0	0	10	0	0	0	0	0	0	0	0	0	0	20	0	8	0	0
GGAGGAACCTTGGAGCTTCGGC	25	118	115	125	17	40	21	53	27	47	0	0	5	90	71	0	43	59
ACTGGACTTGGGGTCAGAAG	10	7	0	11	0	0	14	0	10	6	0	0	0	0	5	9	0	0
TAGAGGAAGCTGTGGAGAGAACT	0	0	0	56	0	0	0	0	0	0	0	0	0	0	7	32	8	0
CCTCCTGCCCTCCTTGCTGTAG	0	0	0	0	0	0	0	26	0	0	0	0	0	0	0	0	11	0
ATGGGGCTTCTGTAGAGATTTC	0	11	0	7	0	0	0	9	0	0	0	0	0	0	0	9	0	0
TGAGTTTAGAGCTGTCTGCT	0	0	0	0	0	0	0	0	0	0	0	0	0	6	0	0	0	7
CAGGCACGGGAGCTCAGGTGAG	0	0	0	0	0	0	5	0	19	0	0	0	6	0	9	5	0	0
TCTGGAAAGCTGGGAAGGGC	0	0	0	0	0	0	0	0	0	0	0	10	0	6	0	0	0	0
TGGGATGAGGGATTGAAGTGGA	0	15	21	33	0	8	12	16	12	12	0	0	5	28	9	39	9	13
ATAAATGAAGTAGAATACATGA	0	15	0	0	0	0	0	0	0	0	0	0	0	0	0	0	5	0
AACTCGTGTTCAAAGCCTTTAG	0	8	8	18	0	0	0	0	0	5	0	0	0	0	5	10	0	0
TAGAGGAAGCTGTGGAGAGAAC	0	0	12	0	0	0	0	0	0	0	0	0	0	0	0	0	0	13
ATGGCCAGAGCTCACACAGAGG	0	0	0	0	0	16	0	0	0	0	0	0	0	40	0	0	0	0
ATGGGGGCTTCTGTAGAGATT	0	0	0	14	0	0	0	0	0	0	0	0	0	0	0	0	0	29
CCGGTCCCAGGAGAACCTGCAG	0	0	0	0	0	0	0	0	0	0	0	0	0	0	5	5	0	0
ATATGGGTTTACTAGTTGGT	0	5	0	0	0	0	0	0	0	0	0	0	0	0	0	0	0	5
TCTGGATGCAAAAAGAAAGGGTG	0	0	0	0	0	0	0	0	5	0	0	0	0	0	6	0	0	0
CAGGGCTGGCAGTGACATGGGT	0	38	6	13	0	13	0	7	0	7	0	0	0	23	30	25	0	5
AAGGGCTTCCTCTCTGCAGGA	0	0	37	0	0	0	0	0	15	0	0	0	0	0	17	0	10	0
TGTTGTACTTTTTTTTTTGTTC	0	0	0	0	0	301	0	41	0	13	0	0	21	0	0	356	34	41
ATTGTCCTTGCTGTTTGGAGAT	0	28	21	35	25	69	13	20	0	22	0	0	0	0	0	30	29	0
ACTGGACTTGGAGTCAGAAA	20	23	32	34	25	9	32	6	49	16	21	18	10	10	21	12	22	20
AGGGGACTGGTTAATAGAACTA	0	14	0	10	0	10	0	0	0	0	0	0	0	36	0	0	0	0
TGTTCCTCTGTCTCCCAGACTCTG	0	0	0	5	0	7	0	0	0	6	0	0	0	0	0	11	0	0
CCTCACCACCCCTTCTGCCTGC	0	0	11	0	0	0	0	6	23	9	0	0	0	0	0	0	0	0
ACTGGATTTGGAGTCAGAAG	5	0	0	13	0	0	5	0	0	0	0	0	0	0	0	0	0	0
AGCAATACTGTTACCTGAAATA	0	10	0	12	0	13	0	0	0	0	0	0	0	16	0	7	0	12
TCAGCACCAGGATATTGTTGGA	14	40	91	7	10	49	12	51	20	17	0	0	0	0	26	31	29	43
CCGGTCCCAGGAGAACCTGCAGA	0	12	0	10	0	0	0	0	0	0	0	0	0	8	0	0	0	7
ACCTGGACCCAGCGTAGACA	0	0	18	0	0	0	0	0	0	0	0	0	0	0	6	0	0	0
GTAGTCCGAGTAACGTCGGGGC	0	0	0	0	0	0	0	0	0	0	0	0	0	0	0	13	0	17
CATGCTGACCTCCCTCCTGCCC	0	0	0	0	0	0	0	0	0	0	17	27	0	0	0	0	0	0
TAACGCATAATATGGACATGT	35	15	26	18	18	23	16	33	23	24	0	0	17	9	0	38	16	37
TCTGGGCACAGGCGGATGGACA	0	0	0	0	0	0	0	0	7	0	0	0	0	5	0	0	0	0
ATCAGGGCTTGTGGAATGGGAAG	0	0	20	15	0	13	0	9	18	19	0	0	0	0	19	10	6	34
TTGAACTGTTAAGAACCACTGG	0	0	0	0	0	148	0	24	0	0	0	0	0	122	23	124	0	0
CACCGACTCTGTCTCCTGCAG	0	10	0	7	0	0	0	62	0	0	0	0	0	0	8	6	0	0
AGGGTGTAGAAGAGAAGAAGAAG	0	0	0	0	0	8	0	6	0	0	0	0	0	0	0	0	0	0
TACATGGATGGAAACCTTCAAGC	0	62	10	31	0	0	0	0	0	17	0	0	0	10	10	46	0	53
TGTGCAGGTGCTGTGTGGGC	0	0	0	5	0	0	0	0	0	0	0	0	0	5	0	0	0	0
AATGTTGGAATCCTCGCTAGAGC	0	0	0	0	6	7	0	0	0	10	0	0	0	0	0	0	0	13
AACTAGCTCTGTGGATCCTGA	0	8	0	0	0	0	0	0	0	0	0	0	0	0	0	0	0	6
TAGGAGCTATCAGAACTTAGTG	0	0	0	6	0	0	0	0	0	0	0	0	0	0	0	6	0	0
TCCGAACTCTCCATTCCTCTGC	0	0	7	6	6	0	0	7	7	13	0	0	0	0	11	0	10	0
GAGACTGGGAACTGGGGATGCG	0	16	0	0	0	7	0	0	0	0	0	0	0	0	0	0	0	0
ATGAGGATGGATAGCAAGGAAG	0	0	0	0	0	0	16	0	0	0	0	0	0	0	0	0	0	0
TCGGGCGCAAGAGCACTGCAGT	0	0	0	9	0	8	0	0	0	0	0	0	0	14	13	21	0	17
TCCTGTACTGAGCTGCCCCGAGC	5	0	8	0	8	0	0	9	42	13	0	0	0	0	12	0	0	0
ACTGGACTAGGAGTCAGAAGG	0	0	0	8	0	0	0	0	0	6	0	0	0	0	0	0	0	0
ACTGGCCTGGGACTACCGGGGG	0	0	0	0	0	0	0	0	0	0	0	0	0	0	7	15	0	19
TGAGTGTGTGTGTGTGAGTGTGA	0	8	25	13	11	21	7	25	17	19	0	0	9	8	22	41	16	9
TATGGAAAGACTTTGCCACTCT	0	10	0	6	0	6	0	0	0	5	0	0	0	0	0	0	0	0
ATGAGTACGGGATCTCTGTAGA	0	15	0	10	0	5	0	0	0	0	0	0	0	8	0	14	0	15
ACTGGCATTAGTGGGACTTTT	0	0	5	0	0	0	0	10	0	0	0	0	0	0	0	0	0	5
TGTGTTGCATGTGTGTATATGT	0	0	0	0	0	0	0	0	0	0	0	0	0	0	27	10	0	0
AGGCGATGTGGGGATGTAGAGA	0	0	5	0	0	0	0	0	0	0	0	0	0	0	0	0	0	6
ACTGGCCTGGGACTACCGGGGGT	0	20	0	0	0	6	0	0	0	8	0	0	0	0	0	0	0	0
TGCACGGCACTGGGGACACGT	0	8	0	22	0	0	0	0	0	0	0	0	0	0	0	0	0	6
AAGGGCTTCCTCTCTGCAGGAC	0	69	0	78	9	72	0	16	0	17	0	0	0	0	0	21	0	89
TCTGGCTGCTATGGCCCCCT	0	0	0	0	0	0	0	0	0	0	12	63	0	0	0	0	0	0
CGCGCCTGCAGGAACTGGTAGA	0	80	5	49	10	17	0	0	0	5	0	0	0	60	7	0	0	0
CCCTTGGGTCTGATGGGGTAGC	0	0	0	5	0	5	0	5	0	0	0	0	0	0	0	0	0	0
TCTGGGCACAGGCGGATGGA	0	0	0	0	0	0	0	0	0	6	0	0	0	0	0	0	0	0
GTTGGCAGGAGCAGAGGATGACT	0	0	0	6	0	0	0	0	0	0	0	0	0	0	0	12	0	24
TTGTGGAAACAATGGTACGGCA	0	0	0	0	0	0	0	0	6	0	0	0	14	0	0	0	0	0
TTGTGGAAACAATGGTACGGC	0	0	0	0	0	0	0	0	0	9	0	0	0	0	0	0	0	0
ACTGACAGGAGAGCATTTTGA	0	11	0	0	0	67	0	9	0	0	0	0	0	16	0	0	0	0
	notes: N=normal,T=tumor; numbers:TPM(transcript per million)
